# Supplementary material for: Lewis acidic W/WO3−x heterostructure-coupled Ir catalysts with low Ir loading for efficient pH-universal water splitting
Source: Royal Society of Chemistry journal article supplement (doi:10.1039/d4ta06958g), 2025-01-01
Supplement: d4ta06958g1.pdf [file d4ta06958g1.pdf]

## Supplementary Information

### Lewis Acidic W/WO<sub>3-x</sub> heterostructure coupled Ir catalysts with low Ir-loading for Efficient pH-Universal Water Splitting

Wenjie Shao<sup>§</sup>, Yiming Zhang<sup>§</sup>, Rui Yan, Tian Ma\*, and Shuang Li\*

#### Supplementary Methods

##### 1. Materials and Chemicals

All chemicals were used as received without further purification. Tungsten chloride (WCl<sub>6</sub>, 99%, Aladdin), iridium (III) chloride hydrate (IrCl<sub>3</sub>·xH<sub>2</sub>O, 99%, Energy Chemical), ethanol (CH<sub>3</sub>CH<sub>2</sub>OH, 99.5%, Aladdin). Ir on Vulcan XC-72 (Ir/C, 20 wt.%, Premetek Company), Pt on Vulcan XC-72 (Pt/C, 20 wt.%, Premetek Company), nafion (D-520, 5% w/w in water and 1-propanol, Energy Chemical), sodium hydroxide (KOH, 85%, Aladdin), concentrated sulfuric acid (H<sub>2</sub>SO<sub>4</sub>, 95%~98%, XiLong Scientific), sodium phosphate dibasic (Na<sub>2</sub>HPO<sub>4</sub>, 99%, Aladdin), and sodium dihydrogen phosphate anhydrous (NaH<sub>2</sub>PO<sub>4</sub>·2H<sub>2</sub>O, 99%, Aladdin). Anion exchange membranes (Fumasep FAA-3-PK-130, 110-130 μm thickness) were purchased from SCI Materials Hub. Deionized water and ultrapure water are made in our laboratory, and all solutions for electrochemical tests are prepared with ultrapure water.

##### 2. Electrochemical Measurements

In a typical preparation of catalyst ink, 10 mg of each catalyst was blended with 1.0 mL Nafion ethanol solution (0.5 wt.%) in an ultrasonic bath for 30 min. The nickel foam (NF) was ultrasonically cleaned by acetone, ethyl alcohol, and ultrapure water in sequence for 20 min. Subsequently, the NF was submerged in 2 M HCl for 20 min, rinsed with ultrapure water several times to remove any additional acid, and then left dry in the air. Then, a fixed volume of catalyst ink (10 mg mL<sup>-1</sup>) was pipetted onto the glassy carbon electrode with a 5 mm diameter (0.196 cm<sup>2</sup>, loading: 0.255 mg cm<sup>-2</sup>) for HER and OER test in 1.0 M KOH, 0.5 M H<sub>2</sub>SO<sub>4</sub>, and 1.0 M phosphate-buffered saline (PBS) to evaluate the catalytic activity of various catalysts in different pH.

All the electrochemical performances were evaluated on the Gamry reference 600 workstation (Gamry, USA) with a standard three-electrode system in different electrolytes at room temperature

with automatic iR compensation, in which the 0.5 M H<sub>2</sub>SO<sub>4</sub> and 1.0 M KOH electrolyte solutions were prepared from 95~98% H<sub>2</sub>SO<sub>4</sub> and KOH pellets with ultrapure water, respectively, the 1.0 M PBS was prepared by diluting a mixture of 0.62 mol Na<sub>2</sub>HPO<sub>4</sub> and 0.38 mol NaH<sub>2</sub>PO<sub>4</sub> to 1.0 L using ultrapure water (15 MΩ, Milli-Q). A commercial reversible hydrogen electrode (RHE) was used as the reference electrode, and the graphite rod was used as the counter electrode. The Hg/HgO reference electrode (placed in saturated KCl solution that was periodically refreshed to counteract the contamination from electrolytes) calibrated with RHE in 0.5 M H<sub>2</sub>SO<sub>4</sub>, 1.0 M KOH, or 1.0 M PBS was used as a reference electrode for long-time stability measurement.

Especially for all HER tests, the electrolytes were saturated with Ar (99.99%) by purging Ar into the aqueous solutions for 30 min and then maintaining the flow of Ar throughout all the electrochemical measurements. The HER and OER polarization curves were obtained at a rotating speed of 1600 rpm with a sweep rate of 10 mV s<sup>-1</sup>, and corrected with real-time iR by Gamry reference 600 potentiostats at a resistance of 4.8 ohms. The water splitting experiment was respectively dropping the Ir-W/WO<sub>3-x</sub> and Ir-W on NF and carried out in an H-type electrolytic cell separated by an anion-exchange membrane for 1.0 M PBS.

The mass activity is calculated based on the following equation:  $\text{mass activity} = \frac{I}{m}$ , where  $I$  (A) is the measured current.  $m$  (mg) is the mass of Ir loaded on a glassy carbon electrode.

The turnover frequency (TOF) is calculated based on the following equation:  $\text{TOF} = \frac{I}{\alpha F n}$ , where  $\alpha = 2$  for HER and  $\alpha = 4$  for OER.  $I$  (A) is the measured current.  $F$  is the Faraday constant (96485 C mol<sup>-1</sup>).  $n$  (mol) is the number of active metals of Ir in the catalysts, which was calculated based on the weight content from XPS measurement.

## Supplementary Figures and Tables

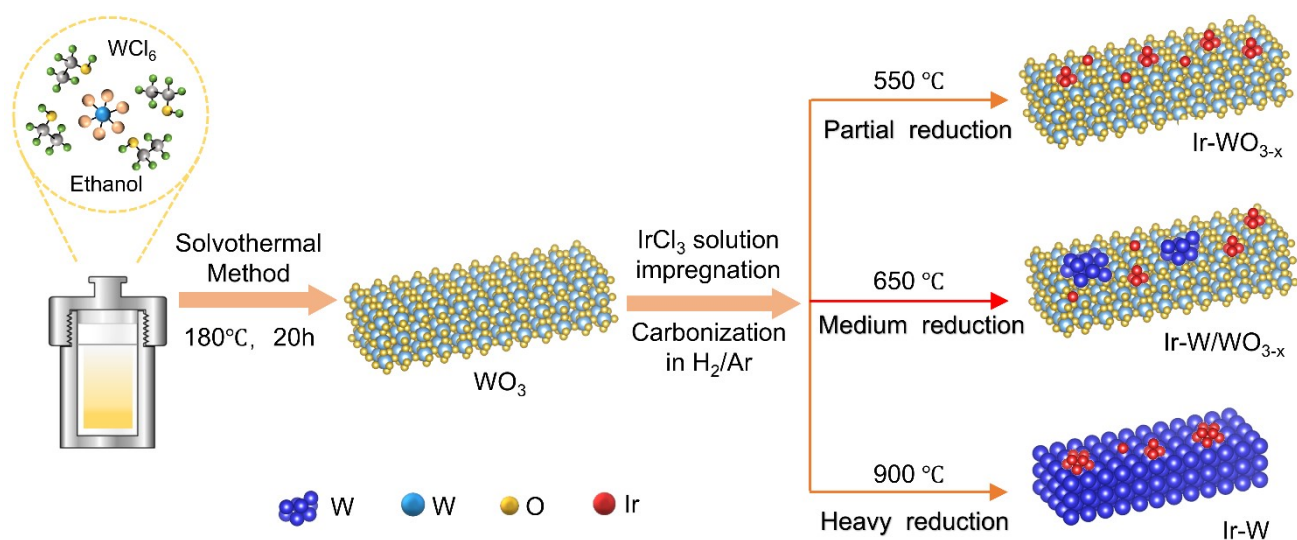

**Fig. S1.** Schematic illustration of the synthesis process of  $\text{Ir-WO}_{3-x}$ ,  $\text{Ir-W}/\text{WO}_{3-x}$ , and  $\text{Ir-W}$ .

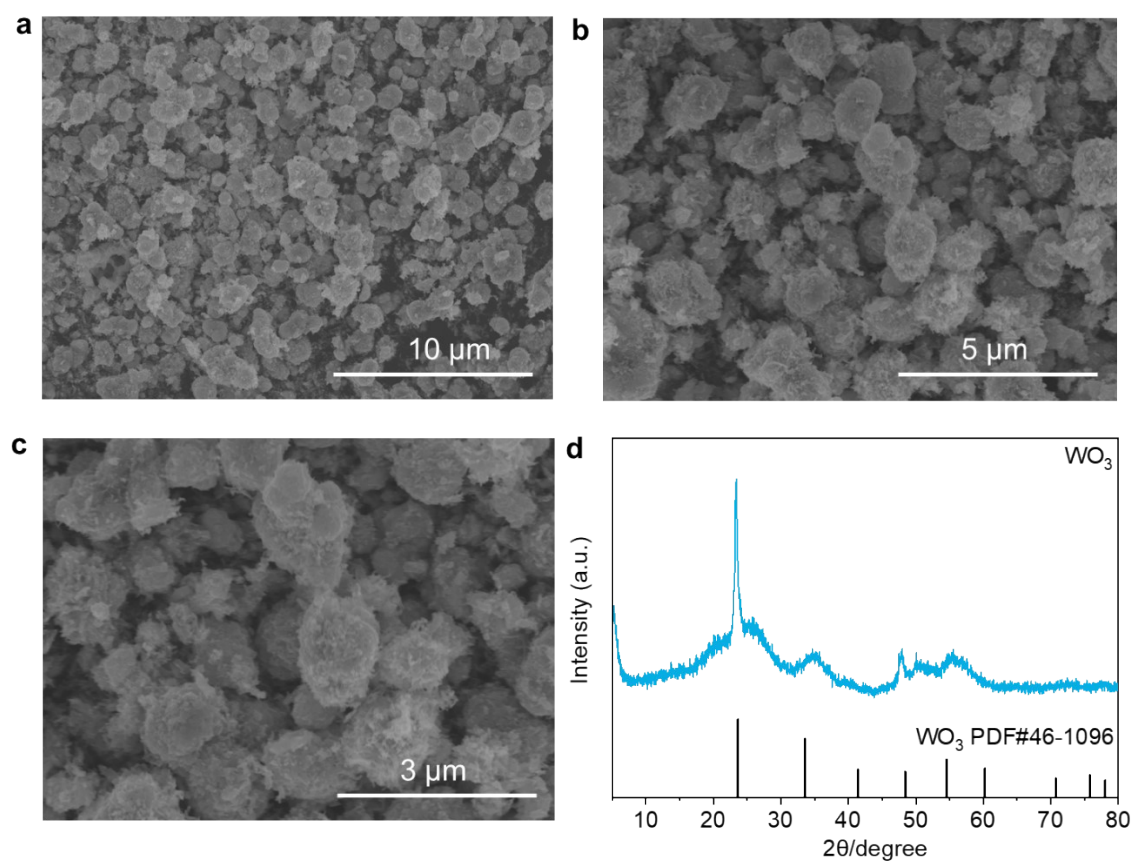

**Fig. S2.** (a-c) The SEM images of  $\text{WO}_3$  at different magnifications. (d) The XRD pattern of  $\text{WO}_3$ .

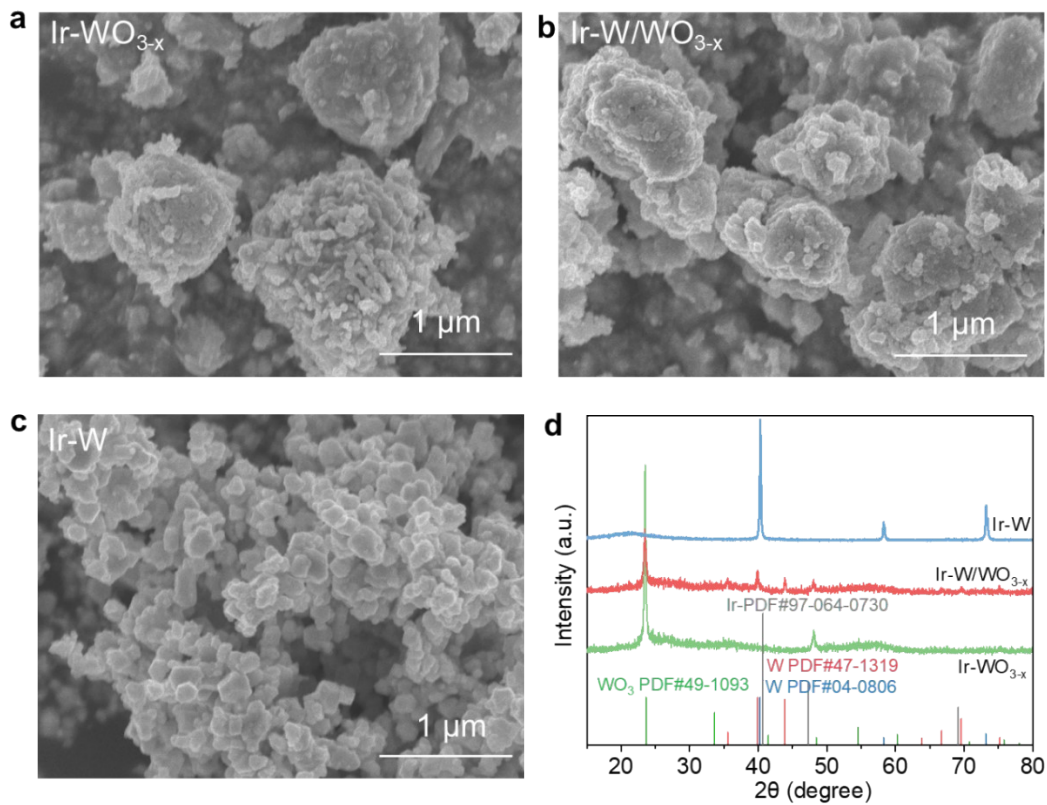

**Fig. S3.** The SEM image of Ir-WO<sub>3-x</sub> (a), Ir-W/WO<sub>3-x</sub> (b), and Ir-W (c), respectively. (d) The XRD patterns of Ir-WO<sub>3-x</sub>, Ir-W/WO<sub>3-x</sub>, and Ir-W.

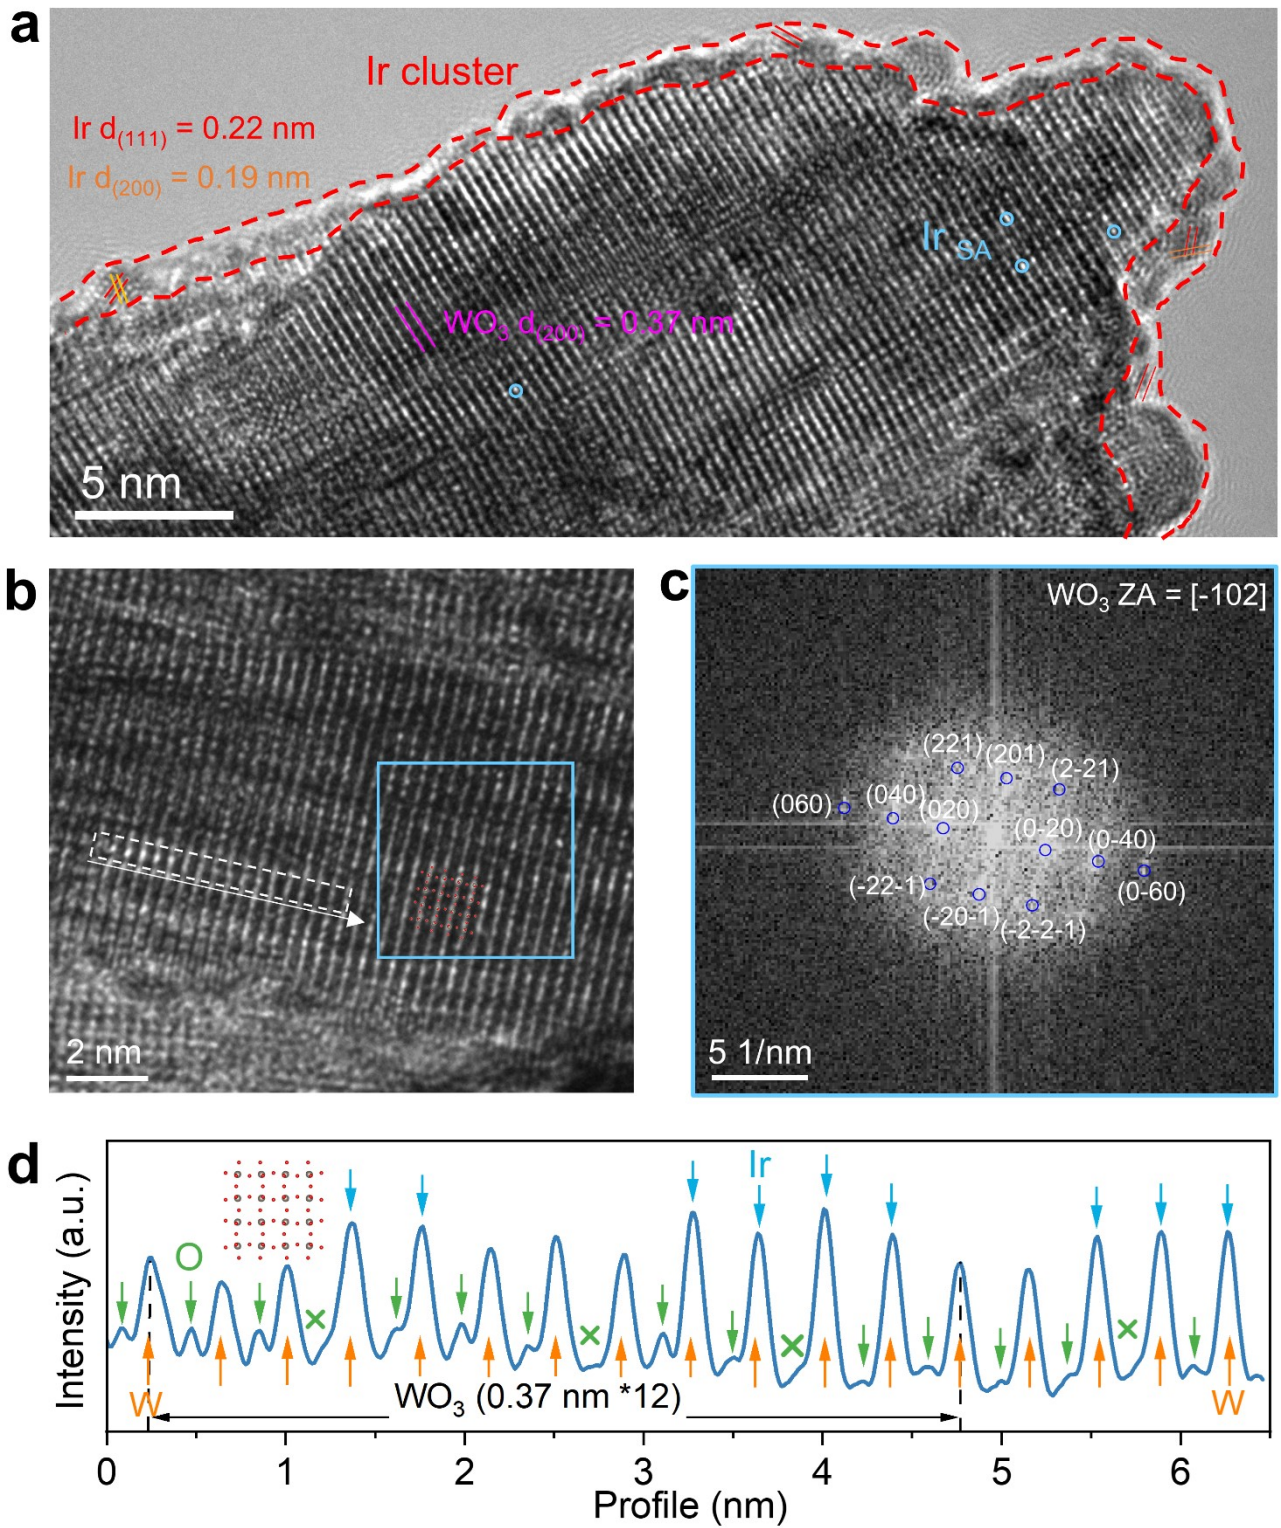

**Fig. S4.** (a-b) The HRTEM images of Ir-WO<sub>3-x</sub>, and (c) corresponding FFT pattern along with the [-102] zone axis from the blue box in (b). (d) The line intensity profiles of the white dotted area of Ir-WO<sub>3-x</sub> from (b).

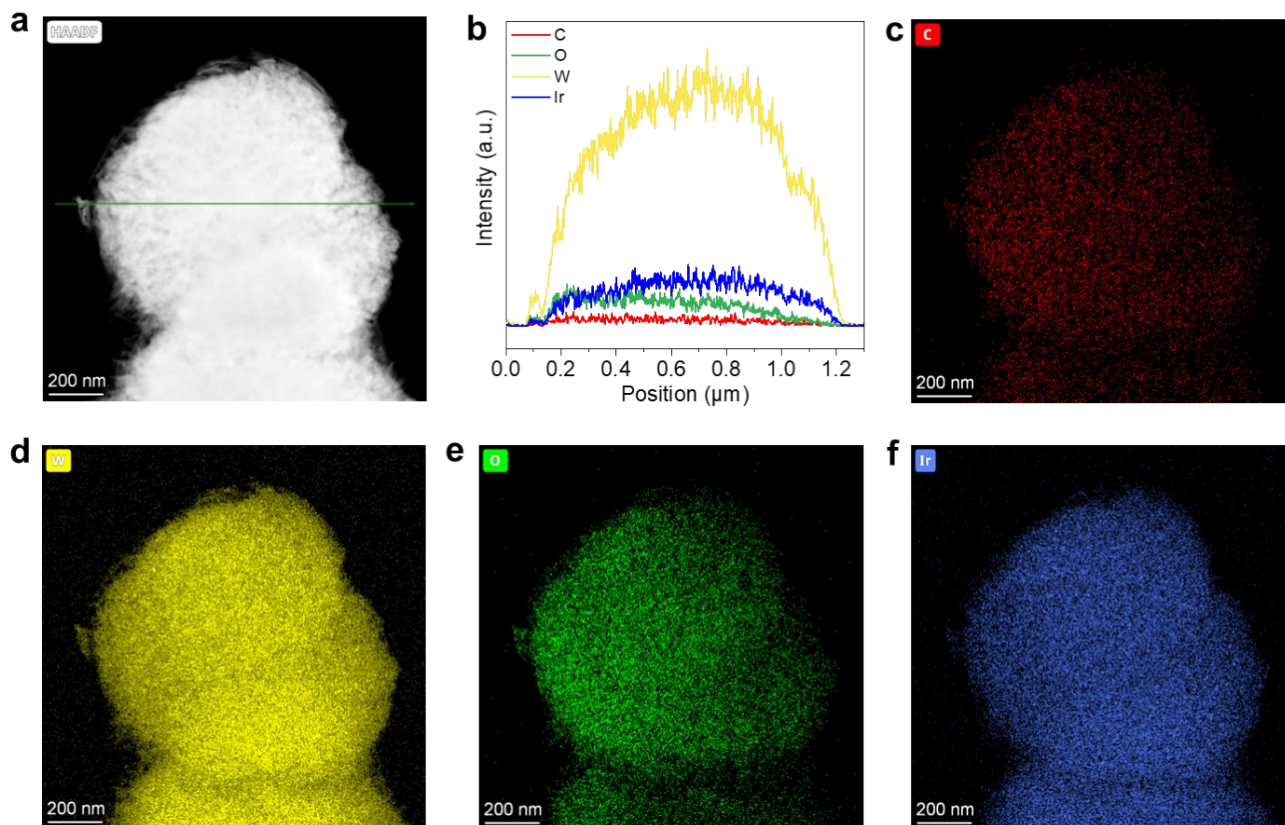

**Fig. S5.** The HAADF-STEM image (a), line scan (b), and corresponding EDS mappings (c-f) of Ir-WO<sub>3-x</sub> show the correlation of the C, W, O, and Ir components.

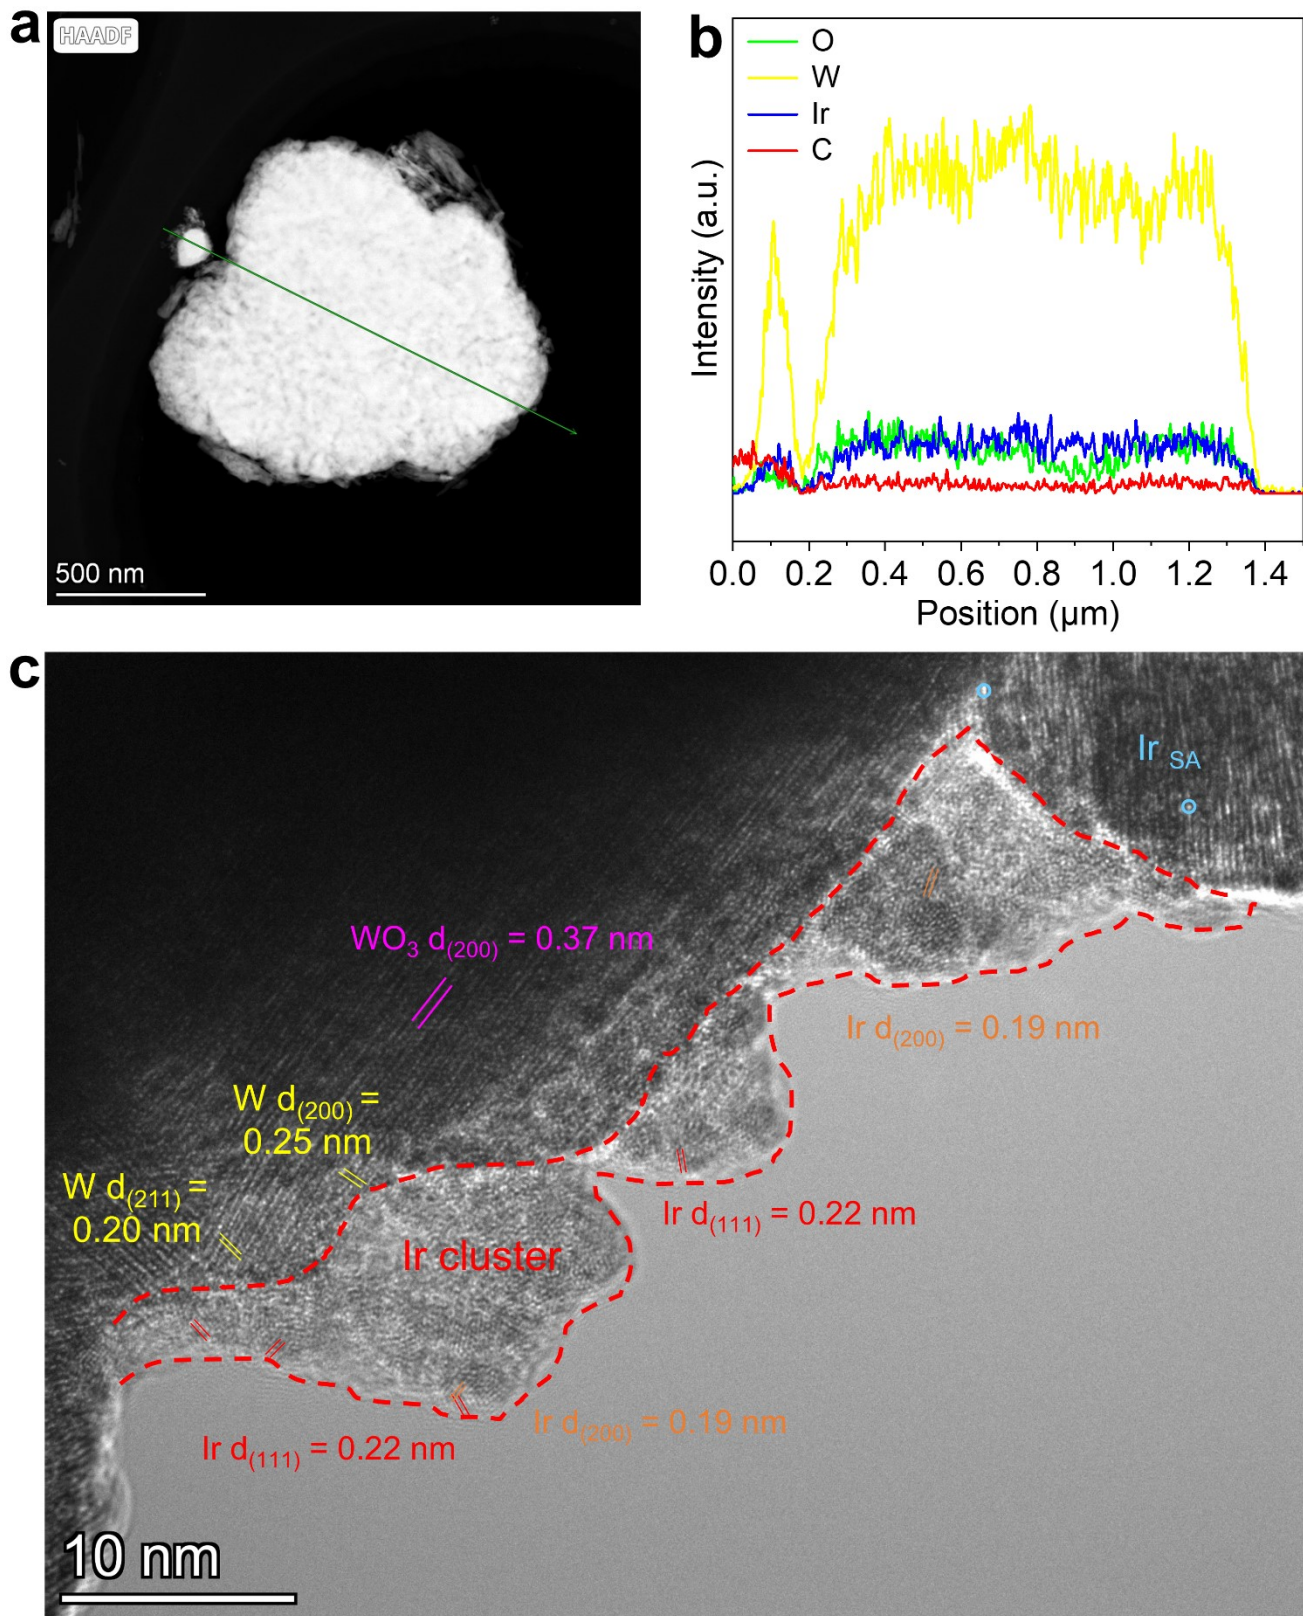

**Fig. S6.** (a) The HAADF-STEM image of Ir-W/ $\text{WO}_{3-x}$ . (b) Line scan along the green arrow of Ir-W/ $\text{WO}_{3-x}$  in (a). (c) HRTEM image of Ir-W/ $\text{WO}_{3-x}$ .

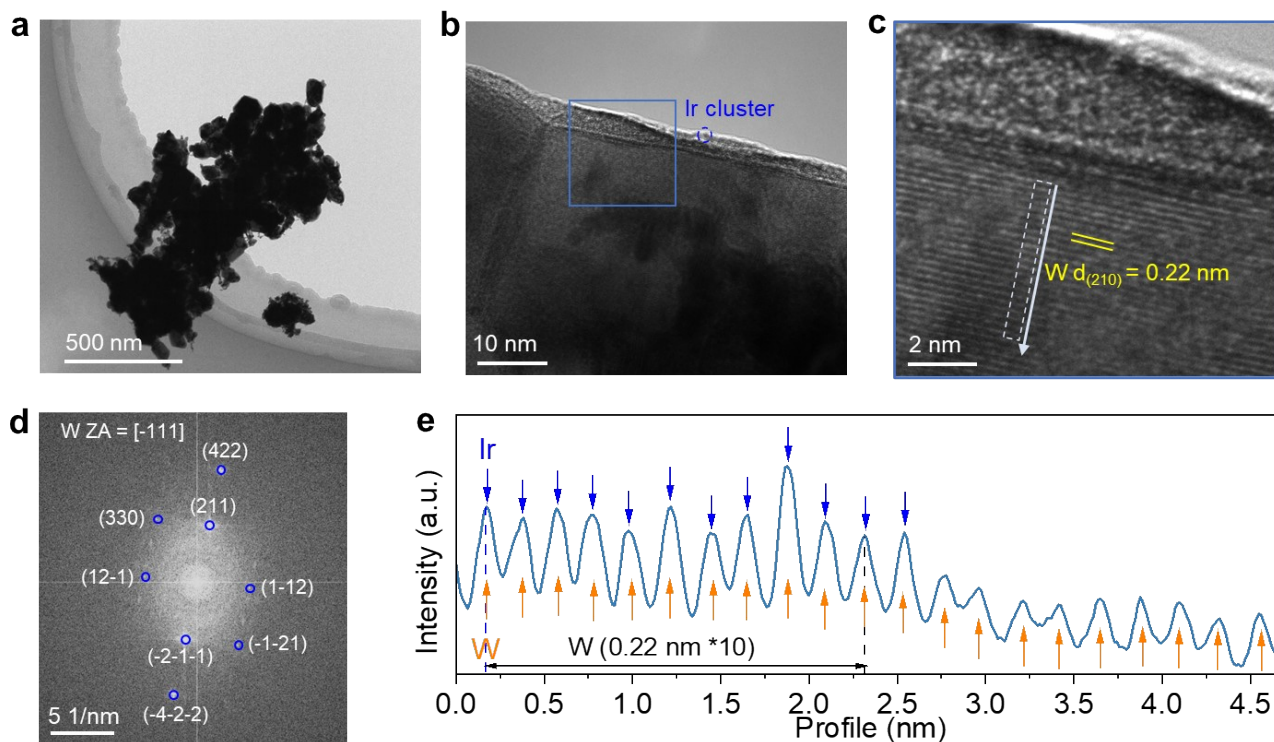

**Fig. S7.** The TEM image (a) and HRTEM images (b-c) of Ir-W, and corresponding FFT and the corresponding FFT pattern along with the [-111] zone axis. e) The line intensity profiles of the blue dotted area of Ir-W from (c).

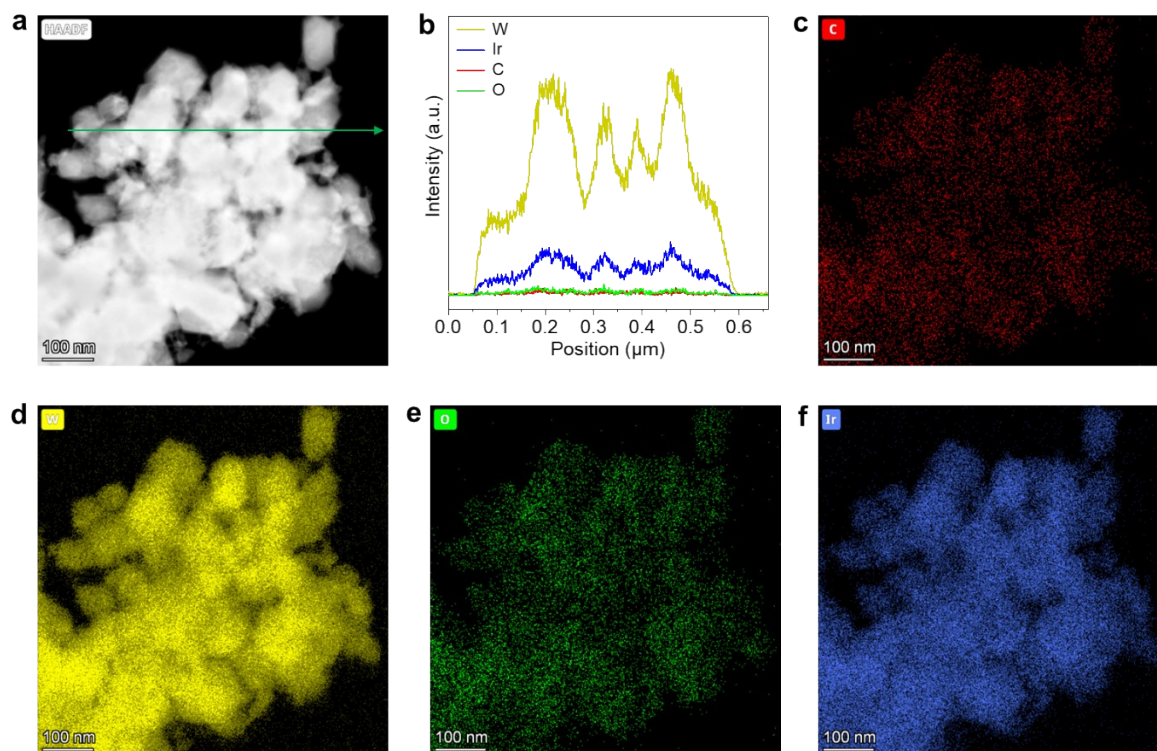

**Fig. S8.** The HAADF-STEM image (a), line scan (b), and corresponding EDS mappings (c-f) of Ir-W show the correlation of the C, W, O, and Ir components.



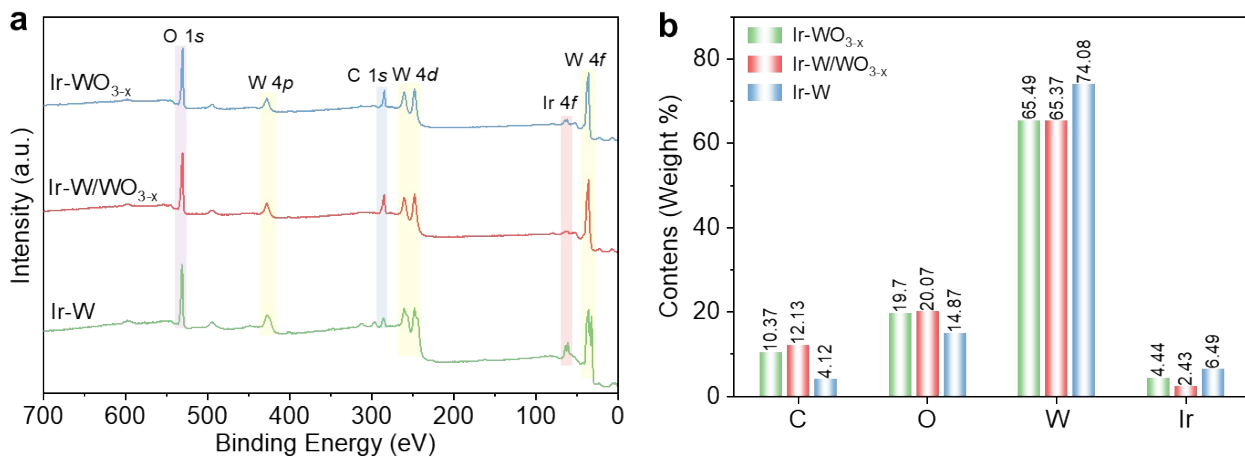

**Fig. S9.** (a) XPS survey spectra, and (b) atom ratios of Ir-WO<sub>3-x</sub>, Ir-W/WO<sub>3-x</sub>, and Ir-W.

**Table S1.** Surface atomic and weight ratios of catalysts that are determined by XPS.

| Catalysts              | C (At%) | O (At%) | W (At%) | Ir (At%) |
|------------------------|---------|---------|---------|----------|
| Ir-WO <sub>3-x</sub>   | 34.89   | 49.78   | 14.40   | 0.93     |
| Ir-W/WO <sub>3-x</sub> | 38.36   | 47.65   | 13.51   | 0.48     |
| Ir-W                   | 20.04   | 54.30   | 23.55   | 2.11     |
| Catalysts              | C (Wt%) | O (Wt%) | W (Wt%) | Ir (Wt%) |
| Ir-WO <sub>3-x</sub>   | 10.37   | 19.70   | 65.49   | 4.44     |
| Ir-W/WO <sub>3-x</sub> | 12.13   | 20.07   | 65.37   | 2.43     |
| Ir-W                   | 4.12    | 14.87   | 74.08   | 6.94     |

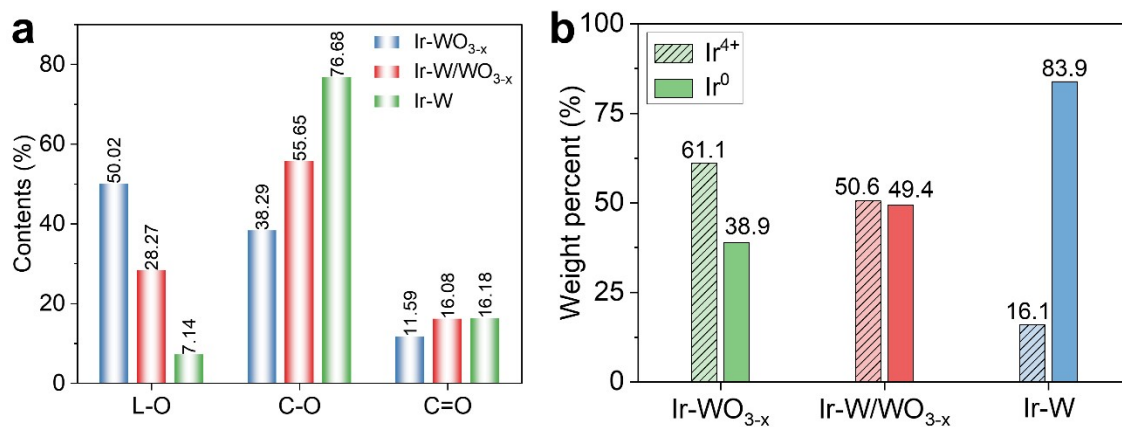

**Fig. S10.** (a) Oxygen ratios variation of lattice-O (L-O), C-O, C=O, and (b) Ir<sup>4+</sup> and Ir<sup>0</sup> species in Ir-WO<sub>3-x</sub>, Ir-W/WO<sub>3-x</sub>, and Ir-W that are determined by XPS, respectively.

**Table S2.** Surface oxygen ratios of metal-O (M-O), C-O, and C=O in catalysts that are determined by XPS.

| Catalysts              | M-O (%) | C-O (%) | C=O (%) |
|------------------------|---------|---------|---------|
| Ir-WO <sub>3-x</sub>   | 56.50   | 34.66   | 8.34    |
| Ir-W/WO <sub>3-x</sub> | 47.40   | 38.27   | 14.33   |
| Ir-W                   | 25.23   | 63.82   | 10.95   |

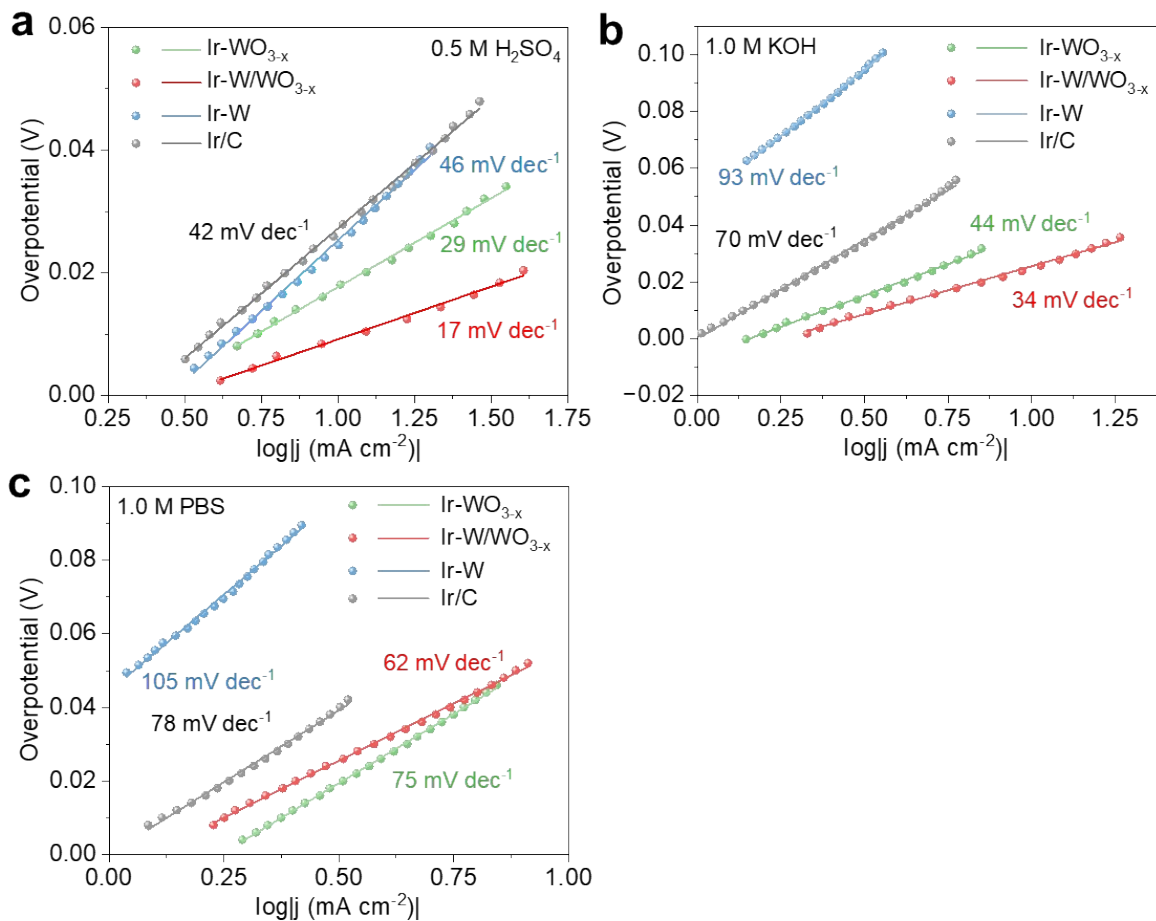

**Fig. S11.** The HER Tafel slopes of Ir-WO<sub>3-x</sub>, Ir-W/WO<sub>3-x</sub>, Ir-W, and Ir/C in 0.5 M H<sub>2</sub>SO<sub>4</sub> (a), 1.0 M PBS (b), and 1.0 M KOH (c), respectively.

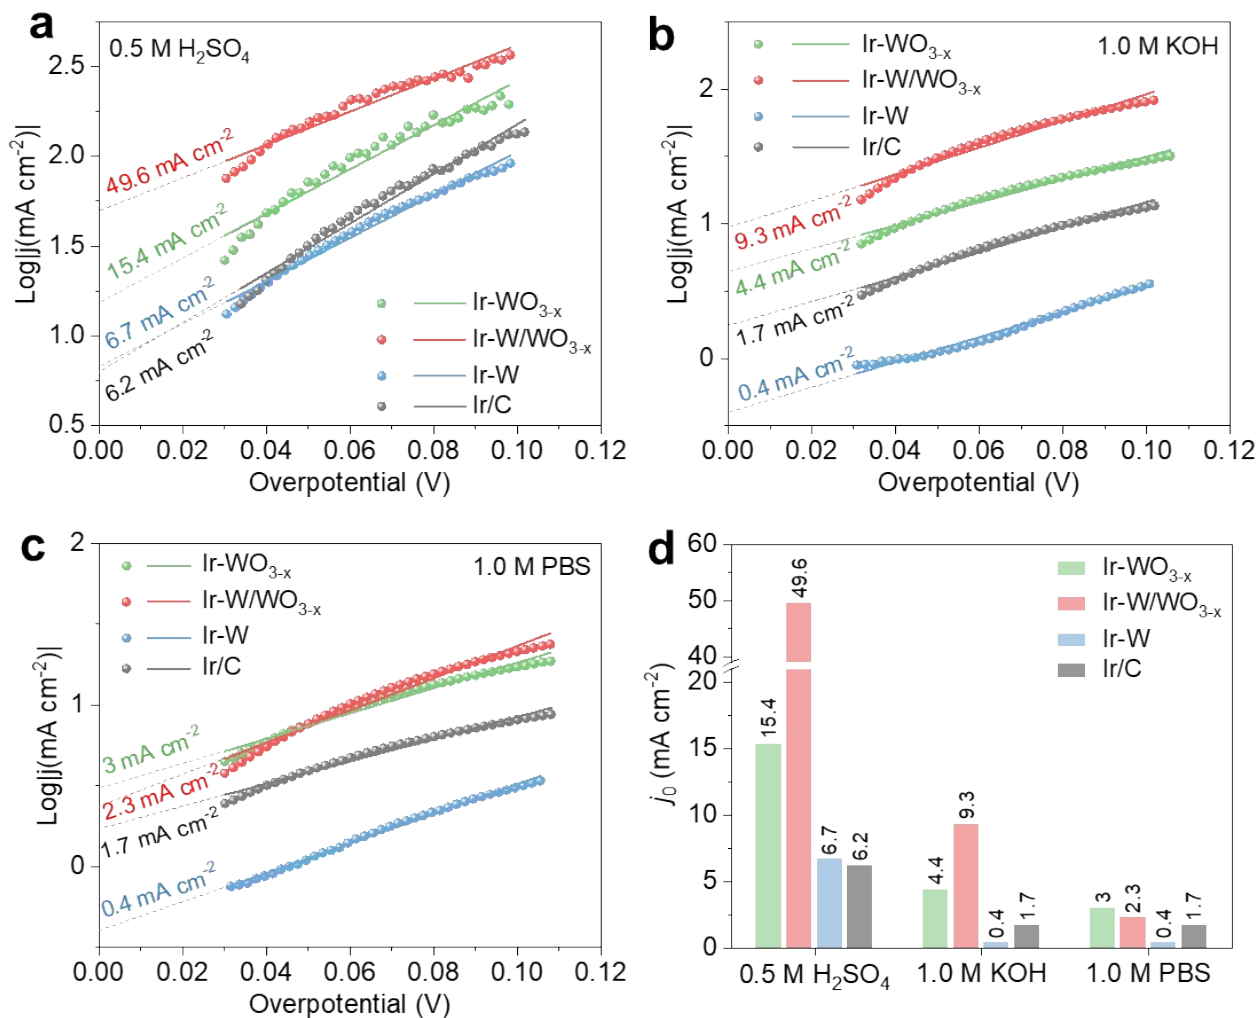

**Fig. S12.** The HER exchange current density ( $j_0$ ) of Ir-WO<sub>3-x</sub>, Ir-W/WO<sub>3-x</sub>, Ir-W, and Ir/C in (a) 0.5 M H<sub>2</sub>SO<sub>4</sub>, (b) 1.0 M KOH, and (c) 1.0 M PBS. (d) The comparison of  $j_0$  values for different catalysts.

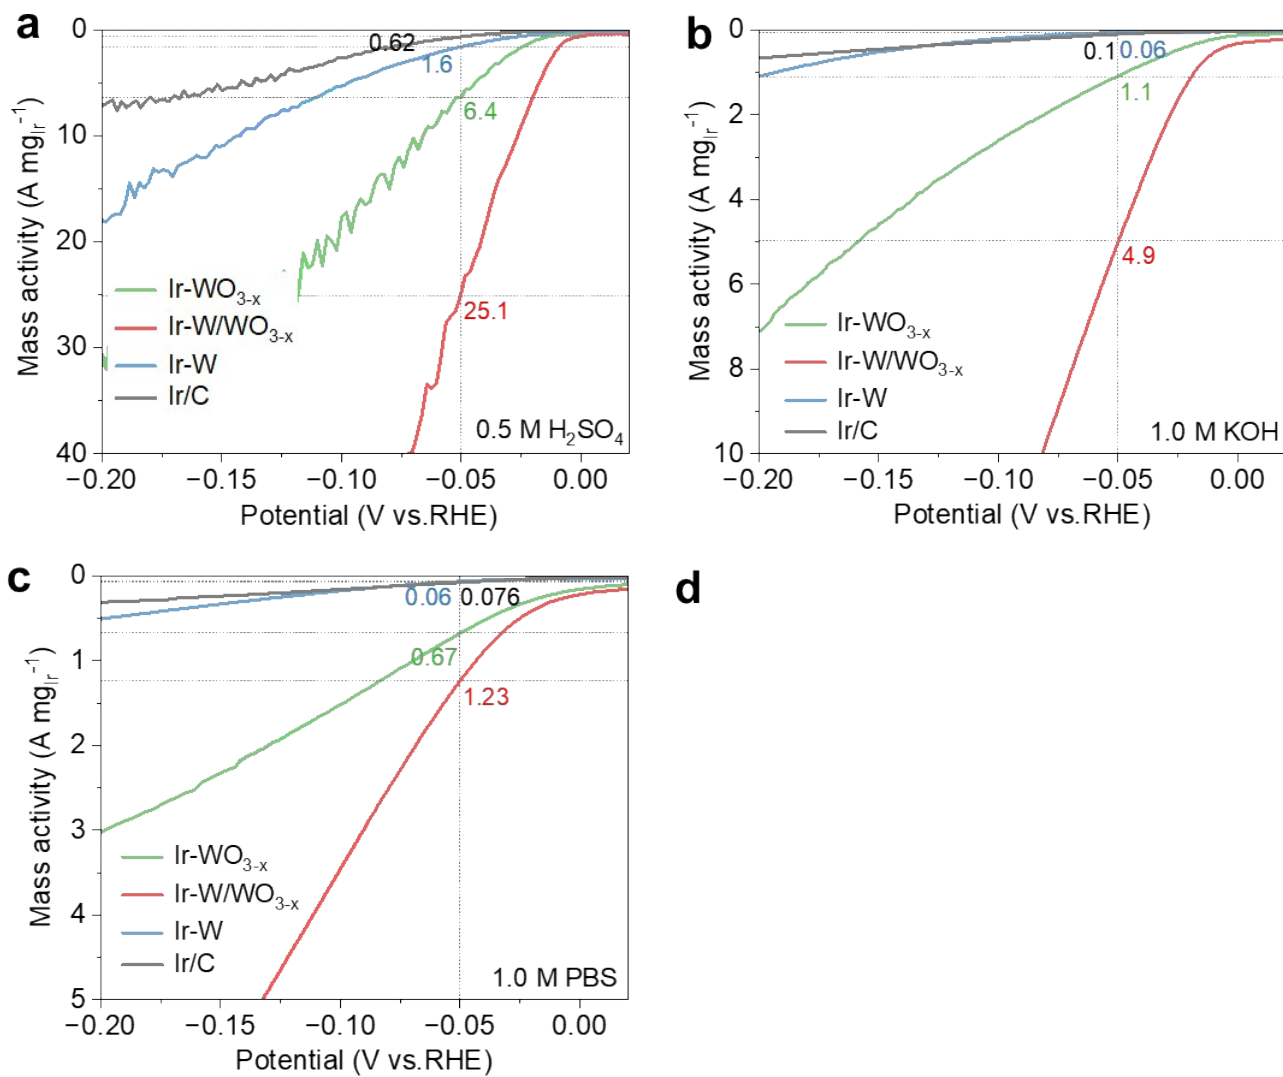

**Fig. S13.** Mass activity curves of catalysts based on the weight content of Ir in (a) 0.5 M H<sub>2</sub>SO<sub>4</sub>, (b) 1.0 M KOH, and (c) 1.0 M PBS for HER.

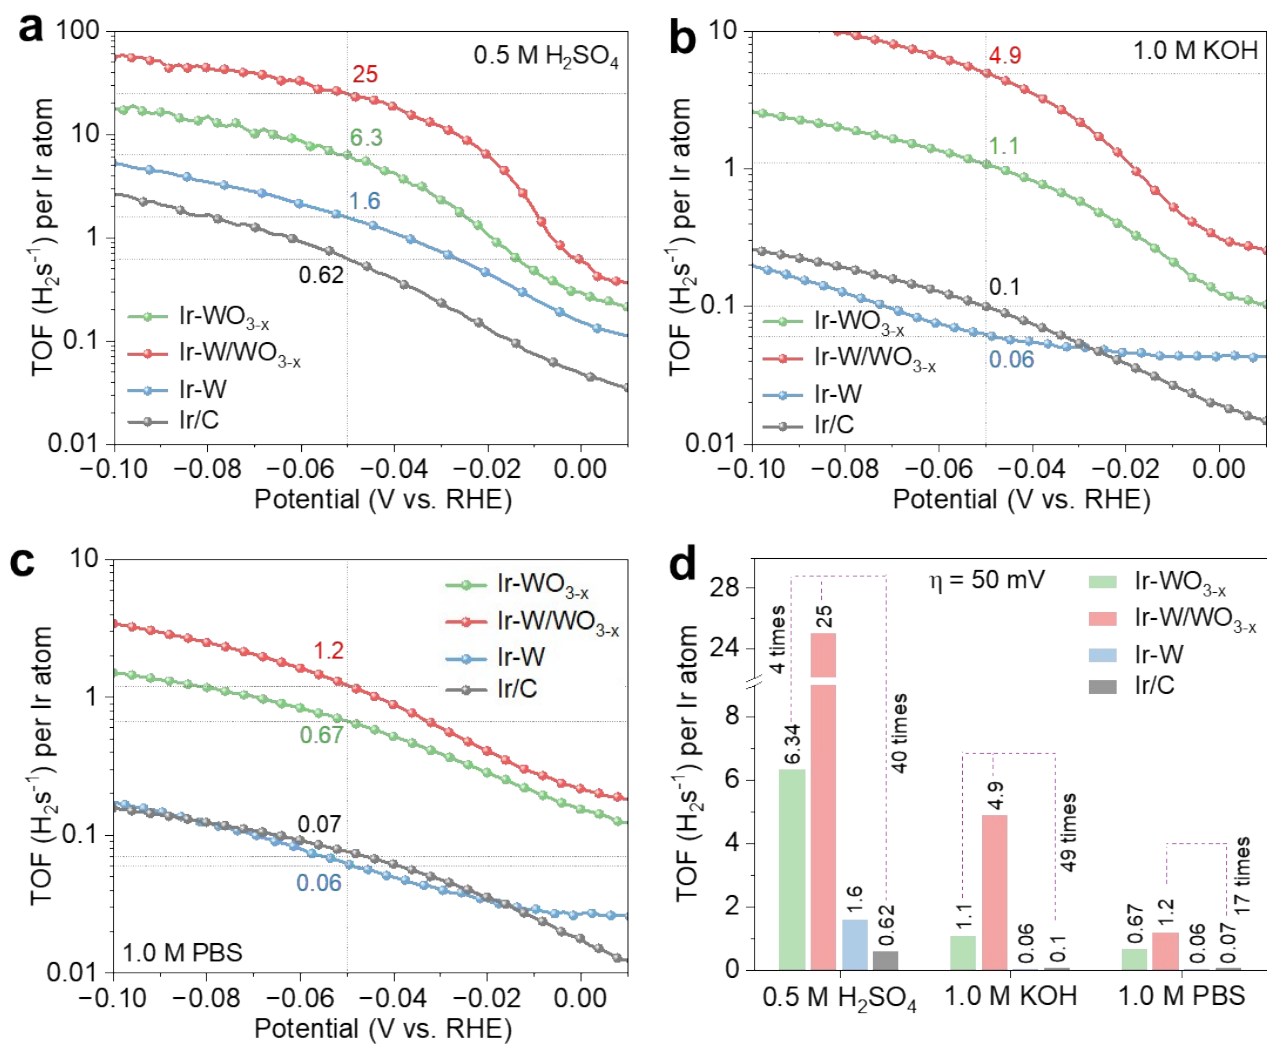

**Fig. S14.** The calculated HER TOF values of Ir-WO<sub>3-x</sub>, Ir-W/WO<sub>3-x</sub>, Ir-W, and Ir/C based on Ir atoms in (a) 0.5 M H<sub>2</sub>SO<sub>4</sub>, (b) 1.0 M KOH, and (c) 1.0 M PBS. (d) The comparison of TOF values at the overpotential of 50 mV for different catalysts.

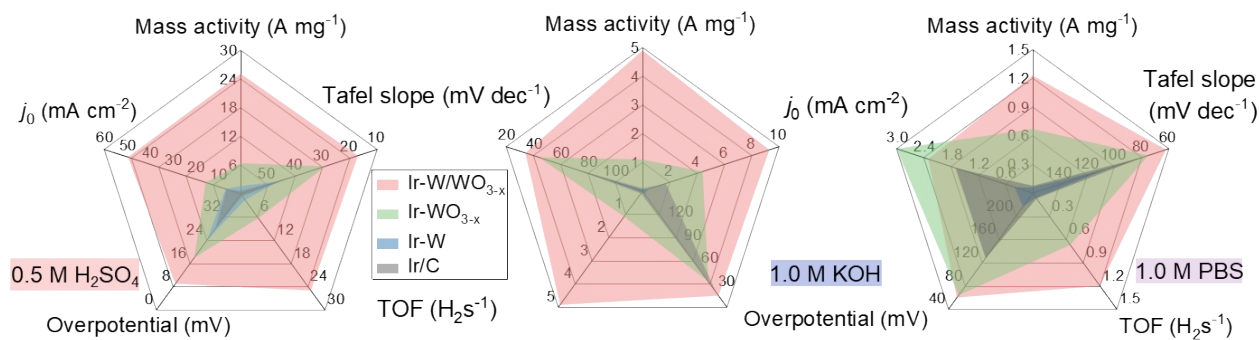

**Fig. S15.** Performance comparison on the mass activities, Tafel slopes, TOF, overpotential, and  $j_0$  of catalysts in different electrolytes.

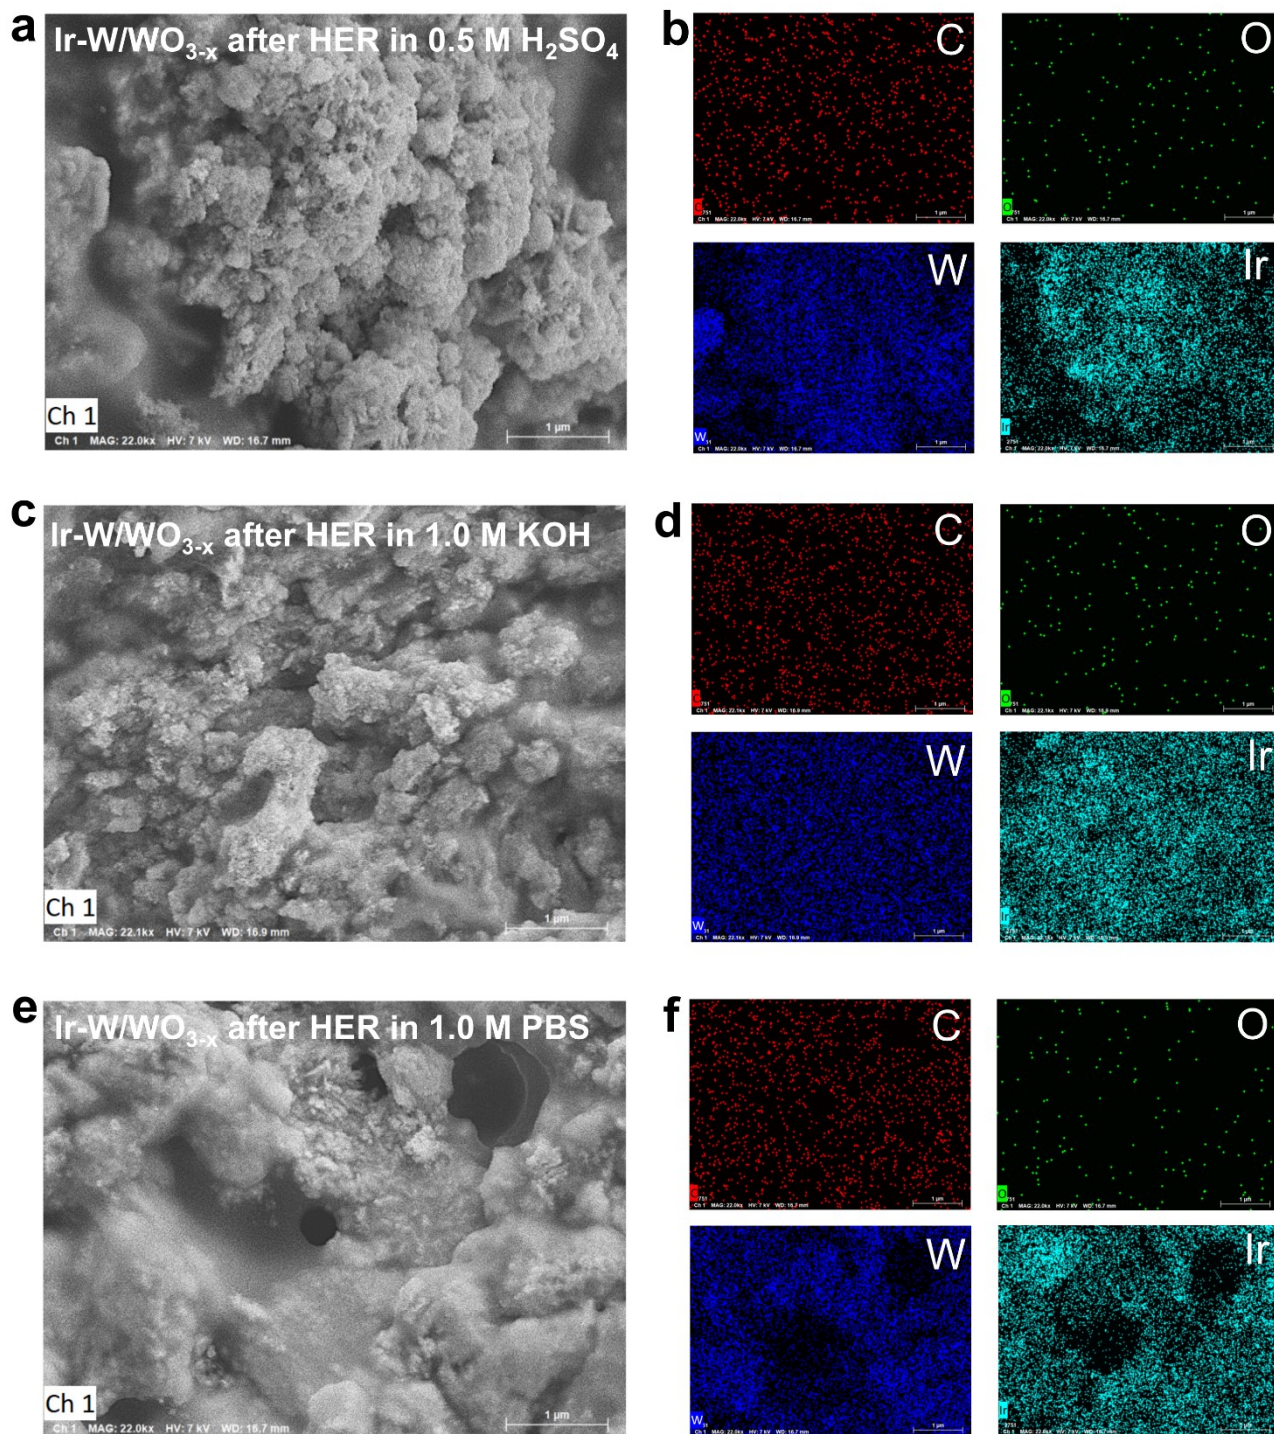

**Fig. S16.** The SEM images and corresponding EDS mapping of Ir-W/WO<sub>3-x</sub>/CC after HER stability test in (a, b) 0.5 M H<sub>2</sub>SO<sub>4</sub>, (c, d) 1.0 M KOH, and (e, f) 1.0 M PBS.

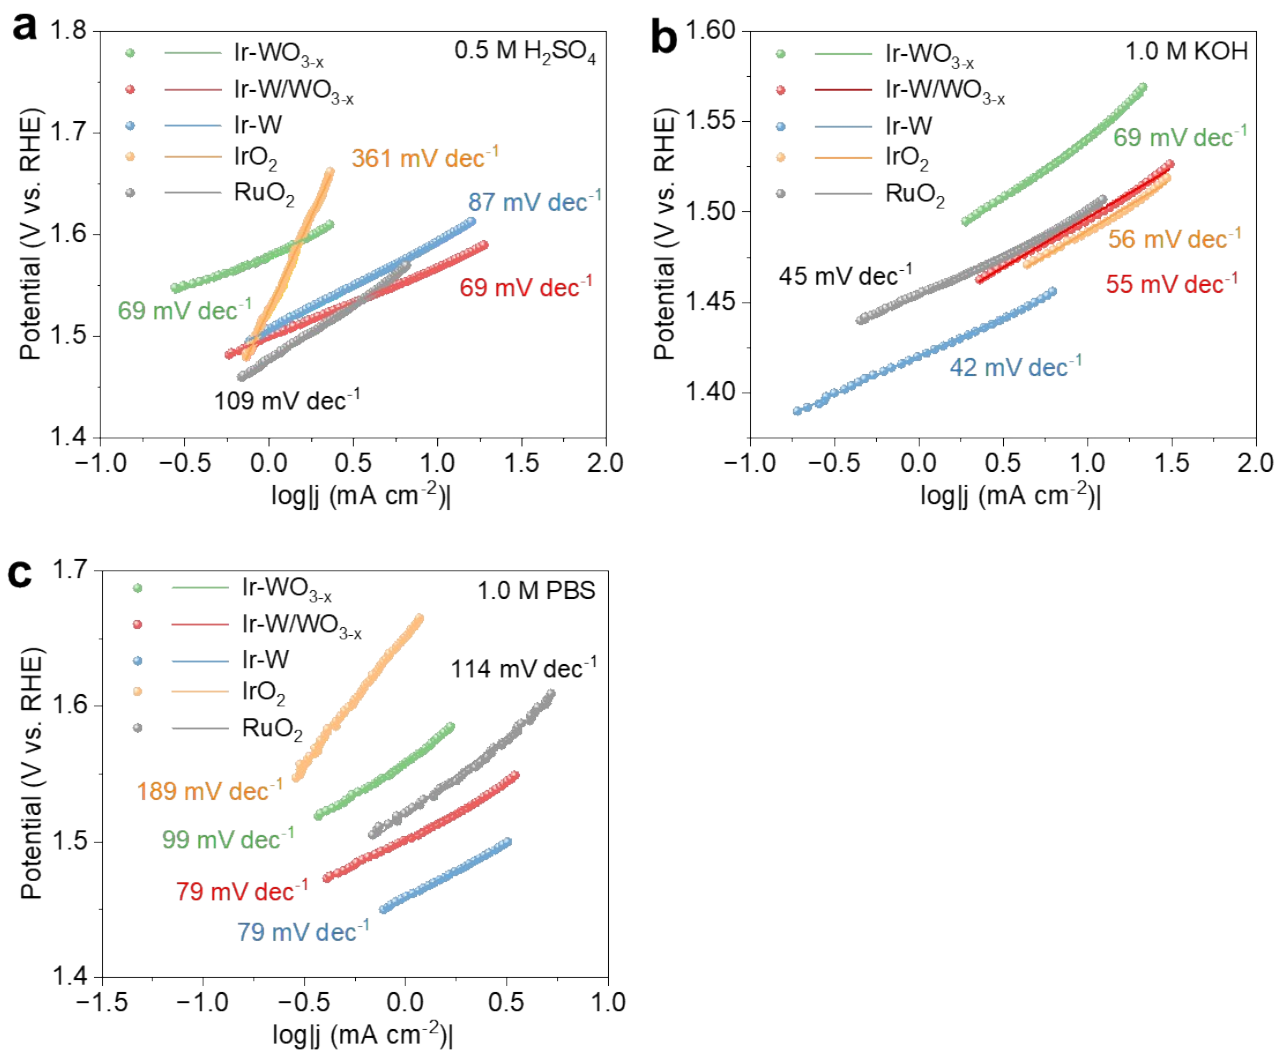

**Fig. S17.** The OER Tafel slopes of Ir-WO<sub>3-x</sub>, Ir-W/WO<sub>3-x</sub>, Ir-W, IrO<sub>2</sub>, and RuO<sub>2</sub> in 0.5 M H<sub>2</sub>SO<sub>4</sub> (a), 1.0 M PBS (b), and 1.0 M KOH (c), respectively.



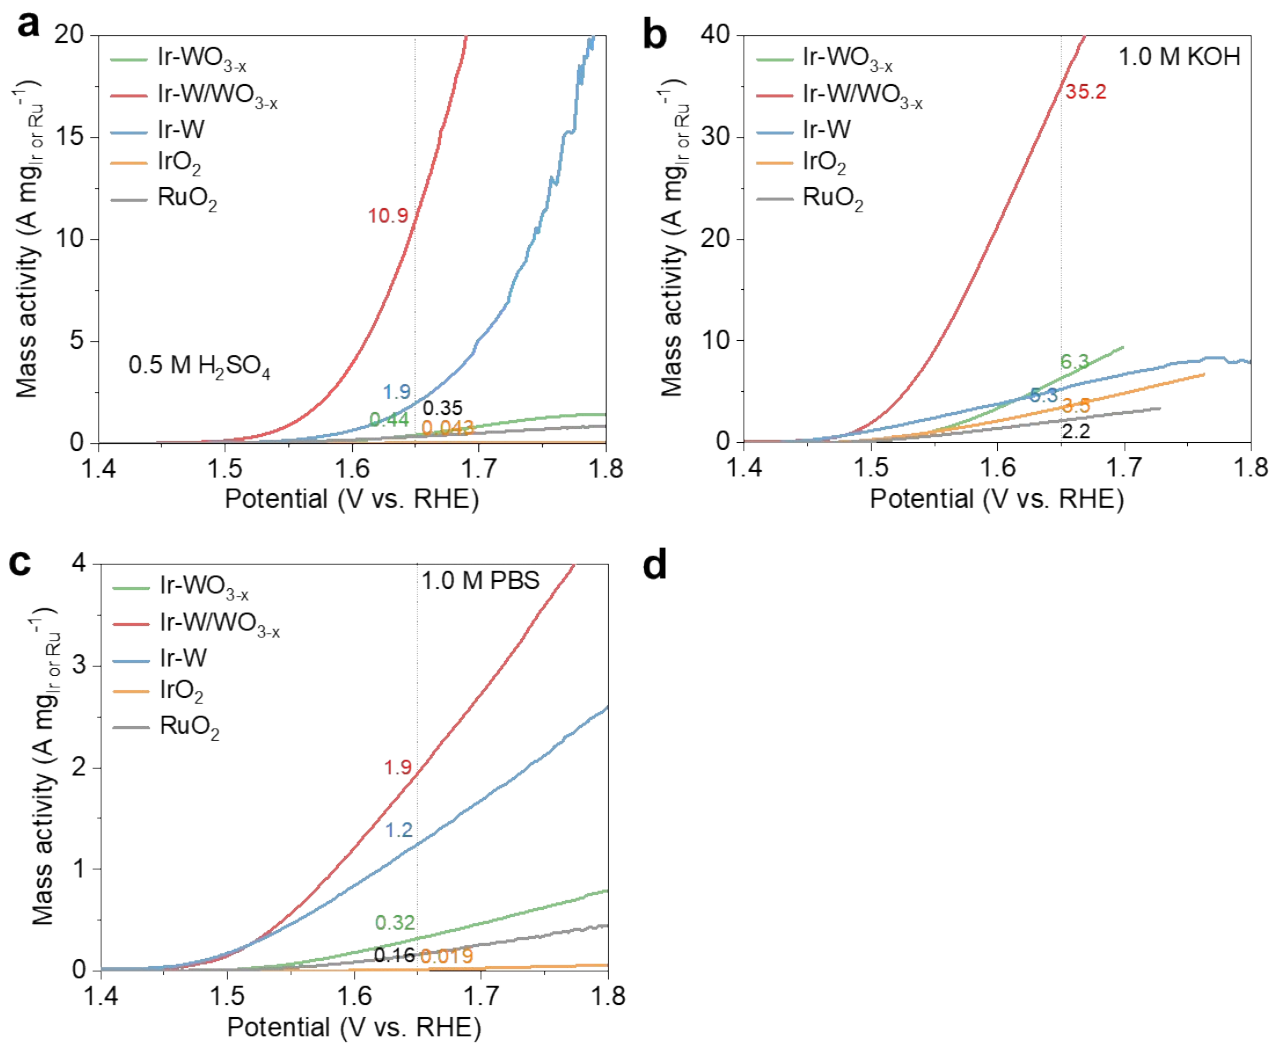

**Fig. S18.** Mass activity curves of catalysts based on the weight content of Ir or Ru in (a) 0.5 M H<sub>2</sub>SO<sub>4</sub>, (b) 1.0 M KOH, and (c) 1.0 M PBS for OER.

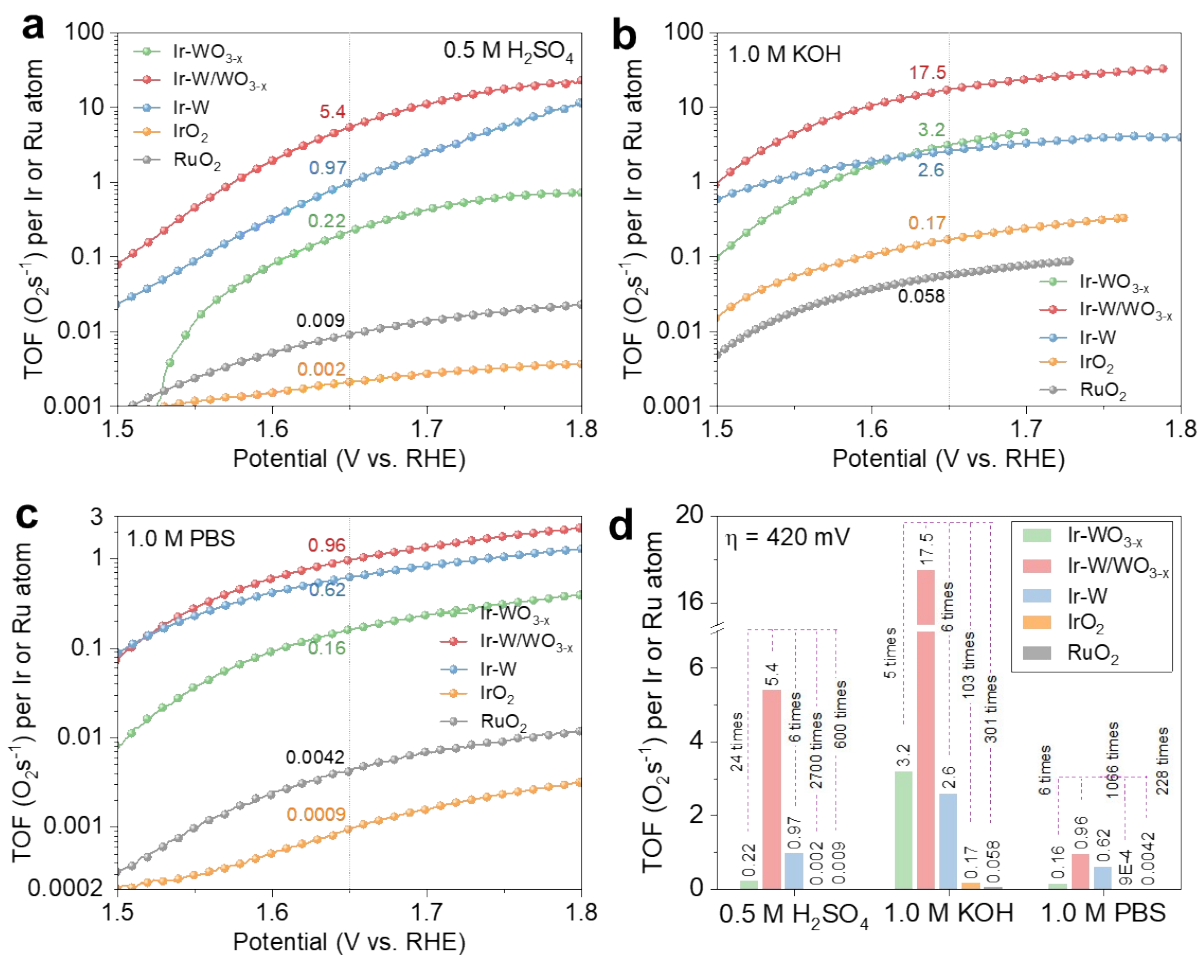

**Fig. S19.** The calculated OER TOF values of Ir-WO<sub>3-x</sub>, Ir-W/WO<sub>3-x</sub>, Ir-W, IrO<sub>2</sub>, and RuO<sub>2</sub> based on Ir or Ru atoms in (a) 0.5 M H<sub>2</sub>SO<sub>4</sub>, (b) 1.0 M KOH, and (c) 1.0 M PBS. (d) The comparison of TOF values at the overpotential of 420 mV for different catalysts.

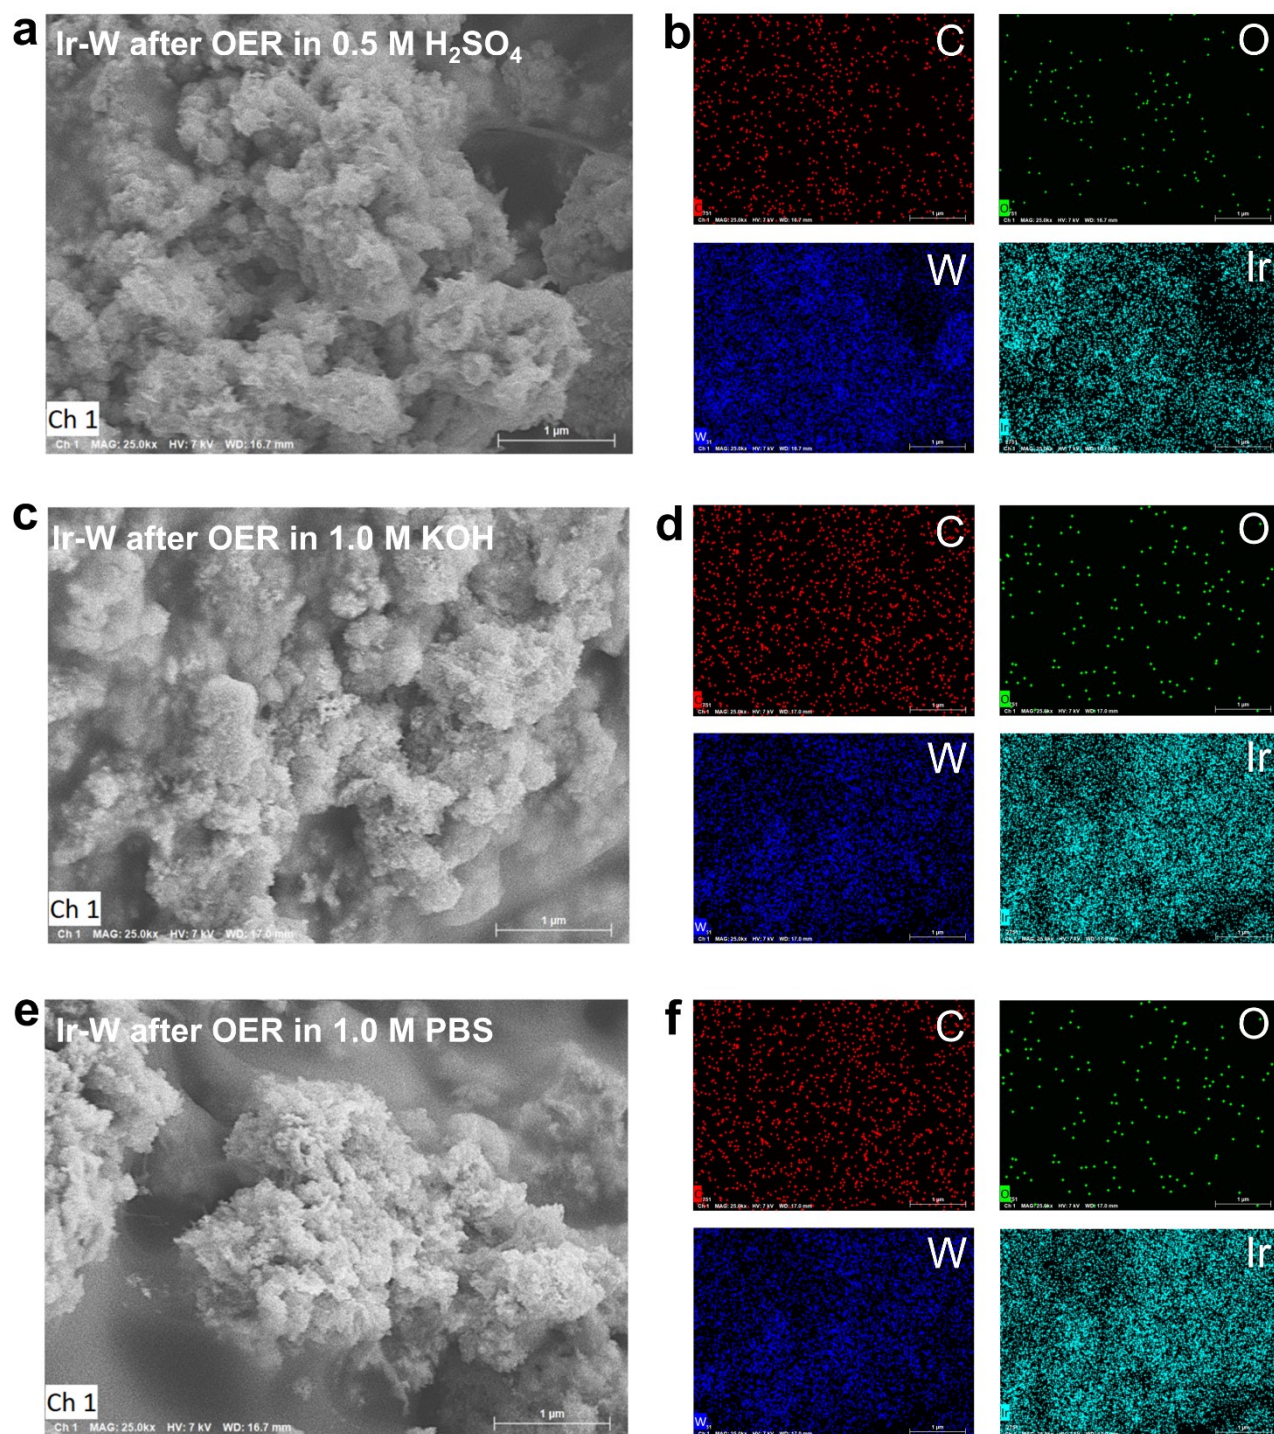

**Fig. S20.** The SEM images and corresponding EDS mapping of Ir-W/CC after OER stability test in (a, b) 0.5 M H<sub>2</sub>SO<sub>4</sub>, (c, d) 1.0 M KOH, and (e, f) 1.0 M PBS.

**Table S3.** Performance comparison of Ir-W/WO<sub>3-x</sub> || Ir-W with other recently reported catalysts for water splitting in 1.0 M PBS.

| Catalysts                                                                                                                    | OWS (V)/j (mA cm <sup>-2</sup> ) | Reference |
|------------------------------------------------------------------------------------------------------------------------------|----------------------------------|-----------|
| Ir-W    Ir-W                                                                                                                 | 1.593/10                         | This work |
| CoMoNiS-NF-31    CoMoNiS-NF-31                                                                                               | 1.8/10                           | 1         |
| 3D CoBOx/NiSe    3D CoBOx/NiSe                                                                                               | 1.8/10                           | 2         |
| Mn-doped FeP/Co <sub>3</sub> (PO <sub>4</sub> ) <sub>2</sub>    Mn-doped FeP/Co <sub>3</sub> (PO <sub>4</sub> ) <sub>2</sub> | 1.82/10                          | 3         |
| Fe@Fe <sub>x</sub> NiO/Ni@Ni <sub>y</sub> CoP    Fe@Fe <sub>x</sub> NiO/Ni@Ni <sub>y</sub> CoP                               | 1.86/10                          | 4         |
| Ni(S <sub>0.5</sub> Se <sub>0.5</sub> ) <sub>2</sub>    Ni(S <sub>0.5</sub> Se <sub>0.5</sub> ) <sub>2</sub>                 | 1.87/10                          | 5         |
| Ni <sub>0.1</sub> Co <sub>0.9</sub> P-CFP    Ni <sub>0.1</sub> Co <sub>0.9</sub> P-CFP                                       | 1.89/10                          | 6         |
| S-NiFe <sub>2</sub> O <sub>4</sub> /NF    S-NiFe <sub>2</sub> O <sub>4</sub> /NF                                             | 1.95/10                          | 7         |

1. Y. Yang, H. Yao, Z. Yu, S. M. Islam, H. He, M. Yuan, Y. Yue, K. Xu, W. Hao, G. Sun, H. Li, S. Ma, P. Zapol and M. G. Kanatzidis, *J. Am. Chem. Soc.*, 2019, **141**, 10417-10430.
2. Y. Liu, T. Sakthivel, F. Hu, Y. Tian, D. Wu, E. H. Ang, H. Liu, S. Guo, S. Peng and Z. Dai, *Adv. Energy Mater.*, 2023, **13**, 2203797.
3. H. Liu, X. Peng, X. Liu, G. Qi and J. Luo, *ChemSusChem*, 2019, **12**, 1334-1341.
4. Q. Che, X. Zhou, Q. Liu, Y. Tan and Q. Li, *J. Mater. Chem. A*, 2021, **9**, 5833-5847.
5. L. Zeng, K. Sun, Y. Chen, Z. Liu, Y. Chen, Y. Pan, R. Zhao, Y. Liu and C. Liu, *J. Mater. Chem. A*, 2019, **7**, 16793-16802.
6. R. Wu, B. Xiao, Q. Gao, Y. R. Zheng, X. S. Zheng, J. F. Zhu, M. R. Gao and S. H. Yu, *Angew. Chem. Int. Ed.*, 2018, **57**, 15445-15449.
7. J. Liu, D. Zhu, T. Ling, A. Vasileff and S.-Z. Qiao, *Nano Energy*, 2017, **40**, 264-273.
